# Supplementary material for: Movement as Medicine for Type 2 Diabetes: protocol for an open pilot study and external pilot clustered randomised controlled trial to assess acceptability, feasibility and fidelity of a multifaceted behavioural intervention targeting physical activity in primary care
Source: PubMed Central journal article supplement (PMC3922792; doi:10.1186/1745-6215-15-46), 2014-02-03
Supplement: 1745-6215-15-46-S2.pdf [file 1745-6215-15-46-S2.pdf]

**Institute of Cellular Medicine, Newcastle University**

**Project title: Movement as Medicine for Type 2 Diabetes**  
**Principal Investigator: Prof Mike Trenell, Newcastle University**

**Healthcare Professional Consent Form**

Please initial

1. I confirm that I been fully informed about my involvement in the Movement as Medicine for Type 2 diabetes study. I have read and understood the Participant Information Sheet dated 12.03.2012 version 1.1 for the study and have had an opportunity to ask questions.
2. I understand that my participation is voluntary and that I am free to withdraw at any time, without giving any reason.
3. I agree take part in the above study.

\_\_\_\_\_  
Name of Healthcare professional

\_\_\_\_\_  
Signature

\_\_\_\_\_  
Date

\_\_\_\_\_  
Researcher

\_\_\_\_\_  
Signature

\_\_\_\_\_  
Date

\_\_\_\_\_  
Name of Person taking consent  
(If different from researcher)

\_\_\_\_\_  
Signature

\_\_\_\_\_  
Date

1. I agree, that if selected I will allow up to four of my diabetes review appointments with each patient recruited to be video recorded for the purpose of this research.
  
2. I agree, that if selected I will take part in an interview with a researcher from Newcastle University for the purpose of this research.
  
3. I agree, that if selected I will take part in a focus group discussion with a researcher from Newcastle University and other primary care practitioners recruited to the study for the purpose of this research.

|                                 |           |      |
|---------------------------------|-----------|------|
| Name of Healthcare professional | Signature | Date |
|---------------------------------|-----------|------|

|            |           |      |
|------------|-----------|------|
| Researcher | Signature | Date |
|------------|-----------|------|

|                                                                 |           |      |
|-----------------------------------------------------------------|-----------|------|
| Name of Person taking consent<br>(If different from researcher) | Signature | Date |
|-----------------------------------------------------------------|-----------|------|

Practice Name:

Practice Identification Number:

Participant Identification Number:

1 copy for researcher; 1 copy for patient; 1 copy to be filed within medical record
