# Supplementary material for: Movement as Medicine for Type 2 Diabetes: protocol for an open pilot study and external pilot clustered randomised controlled trial to assess acceptability, feasibility and fidelity of a multifaceted behavioural intervention targeting physical activity in primary care
Source: PubMed Central journal article supplement (PMC3922792; doi:10.1186/1745-6215-15-46), 2014-02-03
Supplement: 1745-6215-15-46-S6.pdf [file 1745-6215-15-46-S6.pdf]

**Institute of Cellular Medicine, Newcastle University and  
County Durham & Darlington Primary Care Trust**

**Project title: Movement as Medicine for Type 2 Diabetes**

**Principal investigator: Prof Mike Trenell, Newcastle University**

**Patient Informed Consent Form**

**Please initial**

1. I confirm that I been fully informed about my involvement in this study. I have read and understood the Information Sheet (Version 1 dated 20<sup>th</sup> January 2012) provided for the Movement as Medicine for Type 2 diabetes study and have had the opportunity to ask questions.
2. I understand that my participation is voluntary and that I am free to withdraw at any time, without giving any reason.
3. I understand that relevant sections of my medical notes and data collected during the study may be looked at by individuals from the NHS Trust/ Newcastle University Research Team and Regulatory Authorities, where it is relevant to my taking part in this research. I give permission for these individuals to have access to my records.
4. I agree to take part in the Movement as Medicine for Type 2 diabetes study.

---

Name of Patient: \_\_\_\_\_

Date: \_\_\_\_\_ Signature: \_\_\_\_\_

Researcher: \_\_\_\_\_ Date: \_\_\_\_\_ Signature: \_\_\_\_\_

\_\_\_\_\_  
Date: \_\_\_\_\_ Signature: \_\_\_\_\_

Name of Person taking consent  
(If different from researcher)

1. I agree, that if selected I will allow up to a maximum of four of my diabetes review appointments with a primary care practitioner to be video recorded for the purpose of this research.
  
  2. I agree, that if selected I will take part in an interview with a researcher from Newcastle University for the purpose of this research.
  
  3. I agree, that if selected I will take part in a focus group discussion with a researcher from Newcastle University and other participants recruited to the study for the purpose of this research.
- 

Name of Patient: \_\_\_\_\_

Date: \_\_\_\_\_ Signature: \_\_\_\_\_

Researcher: \_\_\_\_\_ Date: \_\_\_\_\_ Signature: \_\_\_\_\_

\_\_\_\_\_  
Name of Person taking consent  
(If different from researcher) Date: \_\_\_\_\_ Signature: \_\_\_\_\_

Practice Name:

Practice Identification Number:

Patient Identification Number:

1 copy for researcher; 1 copy for patient; 1 copy to be filed within medical record
